# Supplementary material for: Gas Chromatography Coupled to High Resolution Time-of-Flight Mass Spectrometry as a High-Throughput Tool for Characterizing Geochemical Biomarkers in Sediments
Source: Hindawi journal article supplement (doi:10.1155/2018/2560498), 2018-12-02
Supplement: f1 [file 2560498.f1.pdf]

Supplementary Material for:

**Gas Chromatography Coupled to High Resolution Time-of-Flight Mass Spectrometry as a High-Throughput Tool for Characterizing Geochemical Biomarkers in Sediments**

Hector Henrique Ferreira Koolen,<sup>1,2\*</sup> Clécio Fernando Klitzke,<sup>3</sup> Joe Binkley,<sup>3</sup> Jeffrey Patrick,<sup>3</sup> Ana Cecília Rizatti de Albergaria-Barbosa,<sup>4,5</sup> Rolf Roland Weber,<sup>5</sup> Márcia Caruso Bicego,<sup>5</sup> Marcos Nogueira Eberlin,<sup>1</sup> Giovana Anceski Bataglion<sup>1,6</sup>

<sup>1</sup> ThoMSon Mass Spectrometry Laboratory, Institute of Chemistry, University of Campinas (UNICAMP), 13083-970, Campinas, SP, Brazil

<sup>2</sup> Metabolomics and Mass Spectrometry Research Group, Amazonas State University (UEA), 69065-001, Manaus, AM, Brazil

<sup>3</sup> LECO Corporation, 49085, St. Joseph, MI, USA

<sup>4</sup> Laboratory of Marine Geochemistry, Geoscience Institute, Federal University of Bahia (UFBA), 40170-020, Salvador, Bahia, Brazil

<sup>5</sup> Marine Organic Chemistry Laboratory, Oceanography Institute, University of São Paulo (USP), 05508-120, São Paulo, SP, Brazil

<sup>6</sup> Department of Chemistry, Federal University of Amazonas (UFAM), 69077-000, Manaus, AM, Brazil

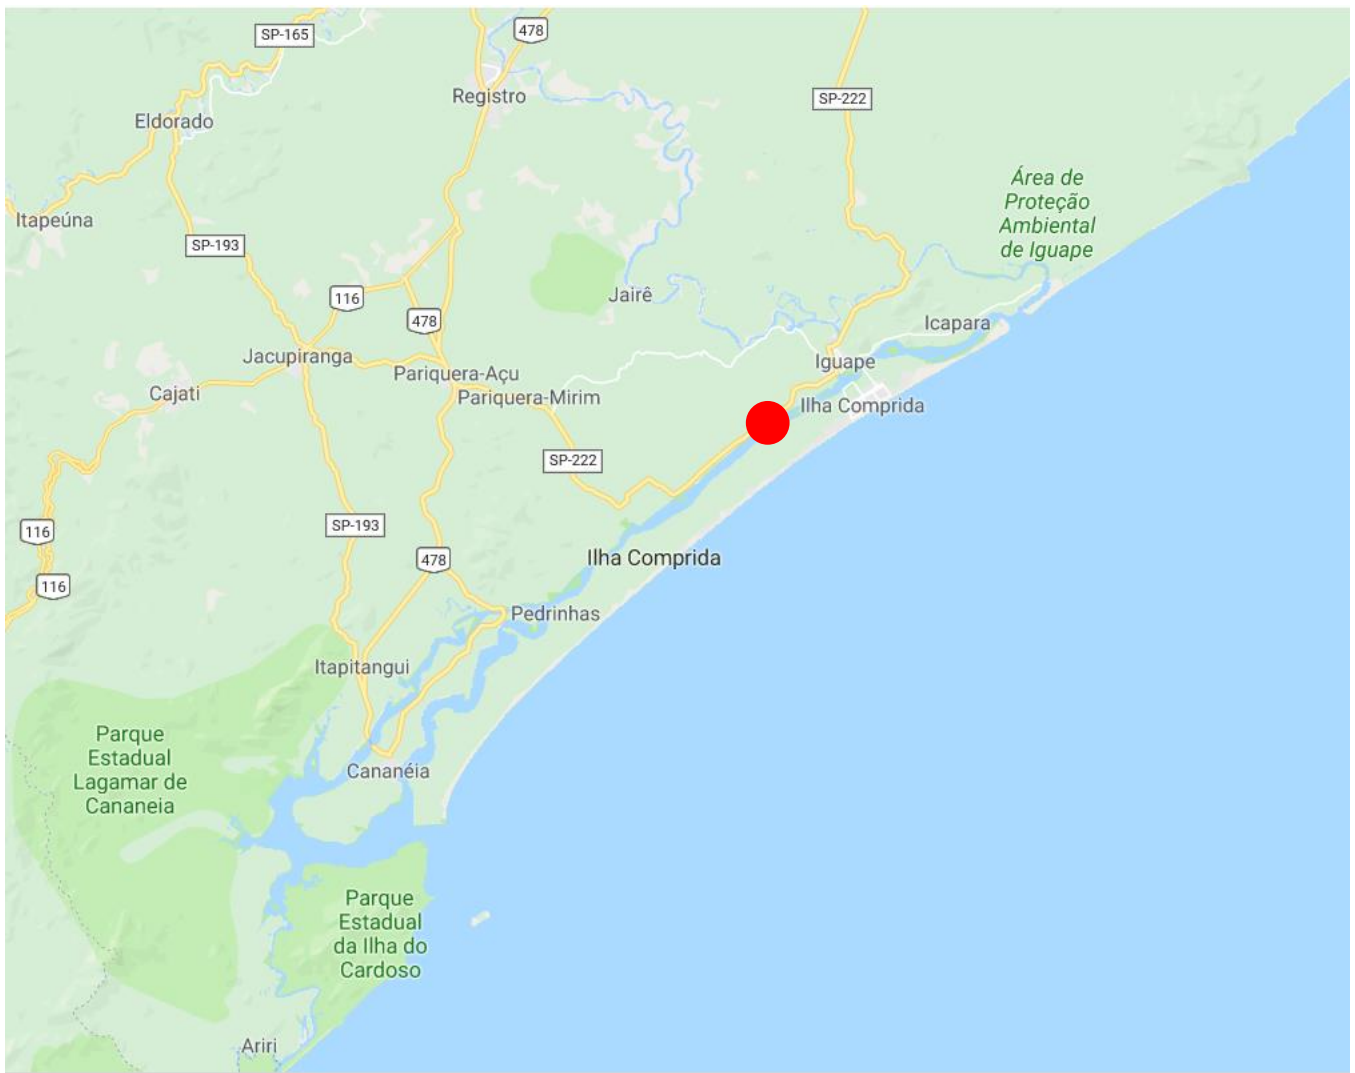

Dados do mapa ©2018 Google 10 km

**Figure S1.** Study area (Cananéia-Iguape Estuarine-Lagunar System (São Paulo, Brazil)) and sampling station of sedimentary core in red, latitude and longitude of 24°45'2.45" S and 47°37'3.70" W, respectively.
